# Supplementary material for: Polymer Nanocomposite Ultrafiltration Membranes: The Influence of Polymeric Additive, Dispersion Quality and Particle Modification on the Integration of Zinc Oxide Nanoparticles into Polyvinylidene Difluoride Membranes
Source: PubMed Central journal article supplement (PMC7559267; doi:10.3390/membranes10090197), 2020-08-24
Supplement: membranes-10-00197-s001.pdf [file membranes-10-00197-s001.pdf]

# Supporting Information: Polymer Nanocomposite Ultrafiltration Membranes: the Influence of Polymeric Additive, Dispersion Quality and Particle Modification on the Integration of Zinc Oxide Nanoparticles into Polyvinylidene Difluoride Membranes

Thorsten van den Berg <sup>1,2</sup>, and Mathias Ulbricht <sup>1,2,\*</sup>

<sup>1</sup> Lehrstuhl für Technische Chemie II, Universität Duisburg-Essen, 45141 Essen, Germany; [thorsten.vandenber@gmail.com](mailto:thorsten.vandenber@gmail.com)

<sup>2</sup> Center for Nanointegration Duisburg-Essen (CENIDE), 47057 Duisburg, Germany

\* Correspondence: [mathias.ulbricht@uni-essen.de](mailto:mathias.ulbricht@uni-essen.de)

Received: 28 July 2020; Accepted: 17 August 2020; Published: date

**Table S1.** Overview of cited studies on nanocomposite ultrafiltration membranes.

| Source*                                | NP Type                        | Solvent | Additive                       | Dispersion method        | Non-solvent | Pure water Permeability | Rejection | Macro void Formation | Hydrophilicity | Tensile Strength | Elongation at Break |
|----------------------------------------|--------------------------------|---------|--------------------------------|--------------------------|-------------|-------------------------|-----------|----------------------|----------------|------------------|---------------------|
| Oh et al. 2009 <sup>[11]</sup>         | TiO <sub>2</sub>               | NMP     | none                           | n.a.                     | iPrOH/water | ↓                       | n.a.      | -                    | ↑              | n.a.             | n.a.                |
| Yan et al. 2006 <sup>[13]</sup>        | Al <sub>2</sub> O <sub>3</sub> | DMAc    | PVP                            | stirring                 | EtOH/water  | ↑                       | -         | -                    | ↑              | ↑                | ↑                   |
| Yu et al. 2009 <sup>[14]</sup>         | TiO <sub>2</sub>               | NMP     | PVP                            | stirring                 | water       | ↗                       | -         | ↓                    | ↑              | ↑                | ↑                   |
| Yari et al. 2019 <sup>[15]</sup>       | SiO <sub>2</sub>               | NMP     | none                           | sonication NP in solvent | water       | ↗                       | ↑         | ↗                    | ↑              | n.a.             | n.a.                |
| Sun et al. 2019 <sup>[16]</sup>        | SiO <sub>2</sub>               | DMAc    | PVP                            | stirring                 | water       | ↗                       | ↑         | ↓                    | ↑              | n.a.             | n.a.                |
| Dong et al. 2012 <sup>[17]</sup>       | Mg(OH) <sub>2</sub>            | DMAc    | PEG                            | NP in solvent            | water       | ↗                       | -         | ↑                    | ↑/↓*           | n.a.             | n.a.                |
| Liu et al. 2011 <sup>[18]</sup>        | Al <sub>2</sub> O <sub>3</sub> | NMP     | H <sub>2</sub> SO <sub>4</sub> | stirring                 | water       | ↗                       | n.a.      | ↓                    | ↑              | ↓                | ↓                   |
| Li et al. 2015 <sup>[19]</sup>         | TiO <sub>2</sub>               | DMAc    | PVP                            | sonication NP in solvent | DMAc/water  | ↑                       | n.a.      | n.a.                 | ↑              | n.a.             | n.a.                |
| Moghadam et al. 2014 <sup>[20]</sup>   | TiO <sub>2</sub>               | DMAc    | PEG                            | sonication of whole dope | water       | ↑                       | ↑         | ↑                    | ↑              | ↑                | ↑                   |
| Saraswathi et al. 2018 <sup>[21]</sup> | MnO <sub>2</sub>               | NMP     | PEG                            | sonication of whole dope | NMP/water   | ↑                       | ↑         | ↑                    | ↑              | ↑                | n.a.                |
| Cao et al. 2006 <sup>[22]</sup>        | TiO <sub>2</sub>               | DMF     | none                           | n.a.                     | water       | ↑                       | -         | -                    | -              | n.a.             | n.a.                |
| Liang et al. 2012 <sup>[23]</sup>      | ZnO                            | NMP     | PVP, Glycerol                  | sonication of whole dope | water       | ↗                       | n.a.      | -                    | ↑              | ↑                | ↑                   |
| Song et al. 2012 <sup>[24]</sup>       | TiO <sub>2</sub>               | DMAc    | PEG                            | n.a.                     | water       | ↑                       | ↓         | n.a.                 | ↑              | n.a.             | n.a.                |
| Yuliwati et al. 2011 <sup>[25]</sup>   | TiO <sub>2</sub>               | DMAc    | LiCl                           | stirring                 | water       | ↗                       | ↑         | ↓                    | n.a.           | n.a.             | n.a.                |

|                                            |                                                            |                       |      |          |                |                           |         |      |      |     |     |
|--------------------------------------------|------------------------------------------------------------|-----------------------|------|----------|----------------|---------------------------|---------|------|------|-----|-----|
| Wei et al.<br>2011 <sup>[26]</sup>         | TiO <sub>2</sub>                                           | DMA<br>c              | PVP  | stirring | EtOH/<br>water | ↑                         | n<br>.a | n.a. | n.a. | ↑   | ↓   |
| Zhang et<br>al.<br>2017 <sup>[27]</sup>    | TiO <sub>2</sub>                                           | DMA<br>c/<br>DMS<br>O | PEG  | stirring | water          | ↓                         | ↑       | n.a. | ↑    | n.a | n.a |
| Yuliwati<br>et al.<br>2011 <sup>[28]</sup> | TiO <sub>2</sub>                                           | DMA<br>c              | LiCl | stirring | water          | ↓                         | ↑       | ↓    | n.a. | n.a | n.a |
| <b>Legend</b>                              |                                                            |                       |      |          |                |                           |         |      |      |     |     |
| ↑                                          | Increase with NP conc.                                     |                       |      |          | –              | no influence              |         |      |      |     |     |
| ↓                                          | Decrease with NP conc.                                     |                       |      |          | n.a.           | information not available |         |      |      |     |     |
| ↗↘                                         | increases at low NP conc., decreases<br>at higher NP conc. |                       |      |          | *              | depends on PEG conc.      |         |      |      |     |     |

\* for references see main paper.

**Table S2.** Overview on materials used in this study.

| <b>Substance</b>          | <b>Type / Quality</b>       | <b>Supplier / Manufacturer</b> |
|---------------------------|-----------------------------|--------------------------------|
| 1,4-dioxane               | p.a.                        | Merck                          |
| 2-butanol                 | ReagentPlus®, ≥ 99%w        | Sigma-Aldrich                  |
| acetone                   | p.a.                        | Fluka                          |
| acetonitrile              | p.a.                        | Merck                          |
| chloroform                | p.a.                        | Acros                          |
| dichloromethane           | p.a.                        | Aldrich                        |
| dimethyl sulfoxide        | p.a.                        | Merck                          |
| dimethylacetamide         | >98%                        | Fluka                          |
| dimethylformamide         | Puris                       | AppliChem                      |
| Ethanol                   | p.a.                        | VWR Chemicals                  |
| ethyl acetate             | p.a.                        | Fluka                          |
| methanol                  | p.a.                        | VWR Chemicals                  |
| methyl ethyl ketone       | ≥99.5%w pure                | Aldrich                        |
| n-hexane                  | 95%                         | Sigma-Aldrich                  |
| N-methyl-2-pyrrolidone    | >99.5 %w pure               | Merck                          |
| polyethylene glycole      | M <sub>w,av</sub> ~ 35 kDa  | Fluka                          |
| polyethylene oxide        | M <sub>w,av</sub> ~ 100 kDa | Aldrich                        |
| polyvinylidene difluoride | Solef 6010 powder           | Solvay Specialty Polymers      |
| polyvinylpyrrolidone      | Luvitec K-30; ≥ 95%w pure   | BASF                           |
| p-xylene                  | p.a.                        | Merck                          |
| sodium azide              | >99%w pure                  | Sigma-Aldrich                  |
| sodium chloride           | ACS, ISO, Reag. Ph. Eur.    | Merck                          |
| Tetrahydrofuran           | p.a.                        | Merck                          |
| zinc oxide nanoparticle   | VP ZnO 20; ≥ 99.5%w pure    | Evonik Industries AG           |

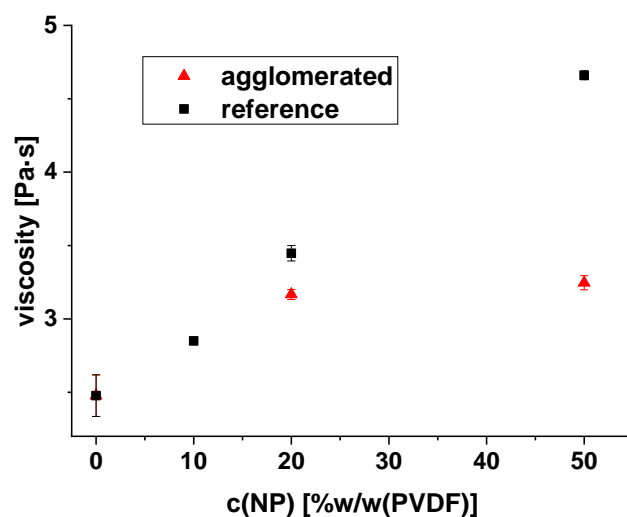

**Figure S1.** Effect of ZnO nanoparticle fraction onto viscosity of PVDF solutions in NMP obtained with (reference) and without sonication (“agglomerated”), measured at  $15.9 \text{ s}^{-1}$  and  $20 \text{ }^\circ\text{C}$ .

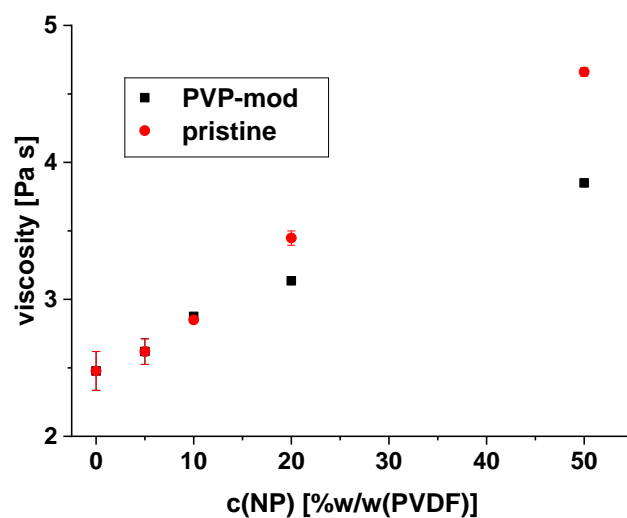

**Figure S2.** Viscosity of dope solutions (16 % PVDF in NMP) at  $15.9 \text{ s}^{-1}$ .

The ZnO particles with PVP modification lost 12.4 % of their mass during conditions simulating the dope solution preparation (cf. Figure 6 in main paper). Under the assumption that this mass consists solely of PVP the PVP concentration of the dope solutions can be calculated. The calculated PVP contents for the dope solutions shown in Figure S2 are presented in the following Table S2.

**Table S3.** Calculated PVP concentration in the dope solutions from Figure S2.

| c(NP) [%w/w(PVDF)] | c(PVP) <sub>calculated</sub> [%] |
|--------------------|----------------------------------|
| 0                  | 0                                |
| 3                  | 0.095                            |
| 5                  | 0.099                            |
| 10                 | 0.198                            |
| 20                 | 0.397                            |
| 50                 | 0.992                            |

The viscosity increase caused by 1% PVP in the dope solution was calculated from the data (cf. Figure 1 in main paper) through linearization to be  $0.44 \pm 0.02$  Pa s. The viscosity of the dope solution with ZnO-PVP particles was calculated by forming the product of the aforementioned viscosity increase for 1% PVP and the calculated PVP content of the dope solution (see Table S2) and then adding the viscosity of the dope solution without PVP for the adjusted ZnO content. The results are presented in Figure S3. It is apparent that the dope solutions with ZnO-PVP exhibit a lower viscosity than calculated values. Therefore, the difference in viscosity cannot be solely explained by the difference in ZnO and PVP content of the dope solutions.

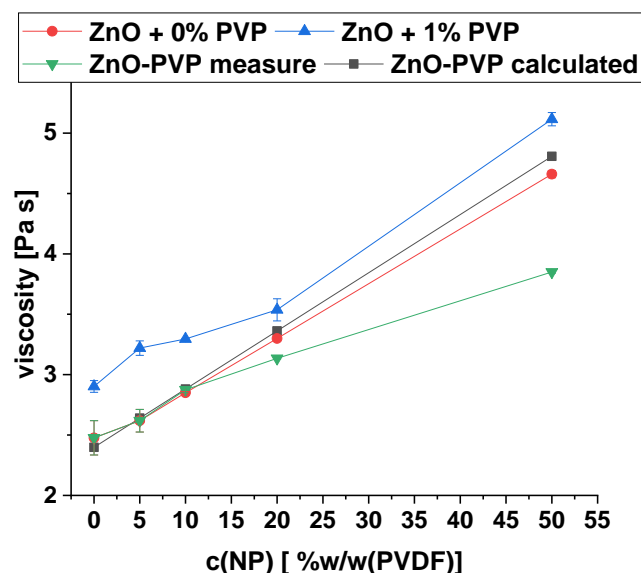

**Figure S3.** Comparison of the viscosity effect of PVP, pristine ZnO particles and ZnO-PVP particles with calculated viscosity increase for ZnO-PVP, measured at  $15.9 \text{ s}^{-1}$  and  $20^\circ\text{C}$ .

**Table S4.** Membrane performance data.

| Membrane       | Permeability [L/h m <sup>2</sup> bar] |     |                |     | Rejection [%] |    |            |    | n  |
|----------------|---------------------------------------|-----|----------------|-----|---------------|----|------------|----|----|
|                | P <sub>0</sub>                        | SD  | P <sub>1</sub> | SD  | PEG 35kDa     | SD | PEO 100kDa | SD |    |
| 1% PVP; no NP  | 1088                                  | 101 | 847            | 87  | 3             | 2  | 87         | 0  | 3  |
| 50% PVP-mod NP | 957                                   | 77  | 759            | 81  | 29            | 15 | 80         | 1  | 2  |
| 1% PVP; 40% NP | 536                                   | 41  | 411            | 25  | 49            | 4  | 81         | 1  | 2  |
| 1% PVP; 50% NP | 500                                   | 232 | 400            | 222 | 57            | 21 | 78         | 11 | 33 |

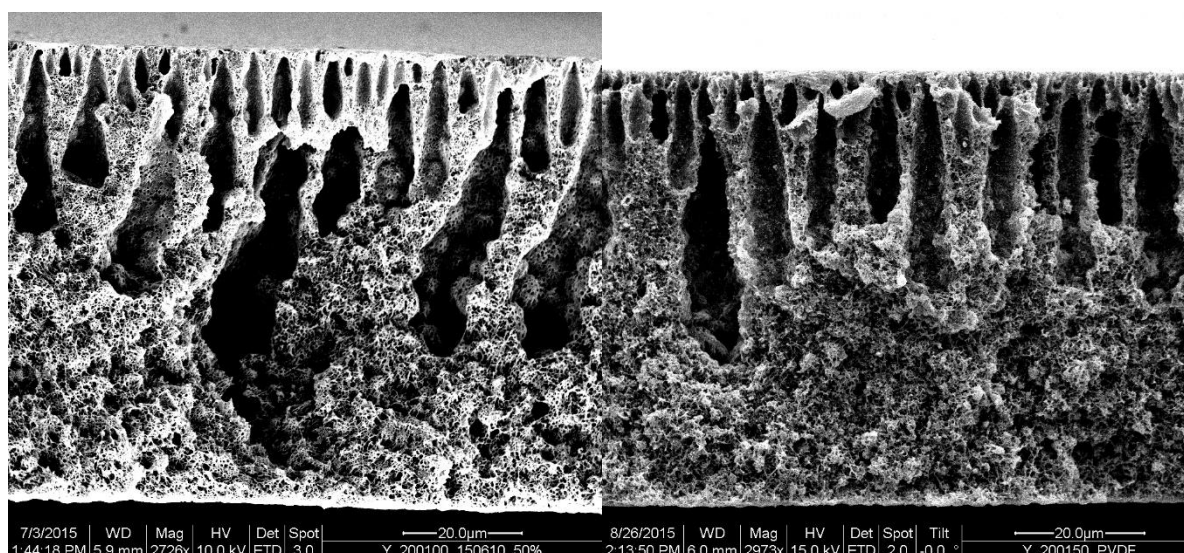

**Figure S4.** Cross-sections morphology of PVDF membranes obtained from dope solutions (20 % PVDF and 1 % PVP in NMP) precipitated in coagulation bath consisting of a 50 %Vol/50 %Vol mixture of NMP and water; left: no zinc oxide at 2726x magnification; right: 50 %w/w(PVDF) zinc oxide at 2973x magnification.
